# Supplementary material
Source: publisher site journal article supplement (https://www.dovepress.com/get_supplementary_file.php?f=276606.docx)
Supplement: Supplementary file 1 [file get_supplementary_file.php]

**Supporting Material**

**The effects of gold nanoparticles on Leydig cells and male reproductive function in mice**

Ying Liua,1, Xiaojie Lia,1, Shuwen Xiaoa, Xinyi Liua, Xuanming Chena, Qiyue Xiaa, Song Leib, Hongxia Lia, Zhihui Zhongc, Kai Xiaoa,*

a *National Chengdu Center for Safety Evaluation of Drugs and National Clinical Research Center for Geriatrics, West China Hospital, Sichuan University, Chengdu, 610041, China*

b *Department of Pathology, West China Hospital, Sichuan University, Chengdu, 610041, China*

c *Laboratory of Non-Human Primate Disease Model research, West China Hospital, Sichuan University, Chengdu, 610041, China*

1 The authors contributed equally in the work.

*Correspondence to Dr. Kai Xiao (E-mail: [xiaokaikaixiao@scu.edu.cn](mailto:xiaokaikaixiao@scu.edu.cn); Tel: +86-28-83326313)





Figure S-1. (A) The size distribution of AuNPs after 72-h incubation in cell culture medium with 5% horse serum and 2.5% fetal bovine serum were determined by dynamic light scattering (DLS). (B) The zeta potential of AuNPs was measured by DLS.


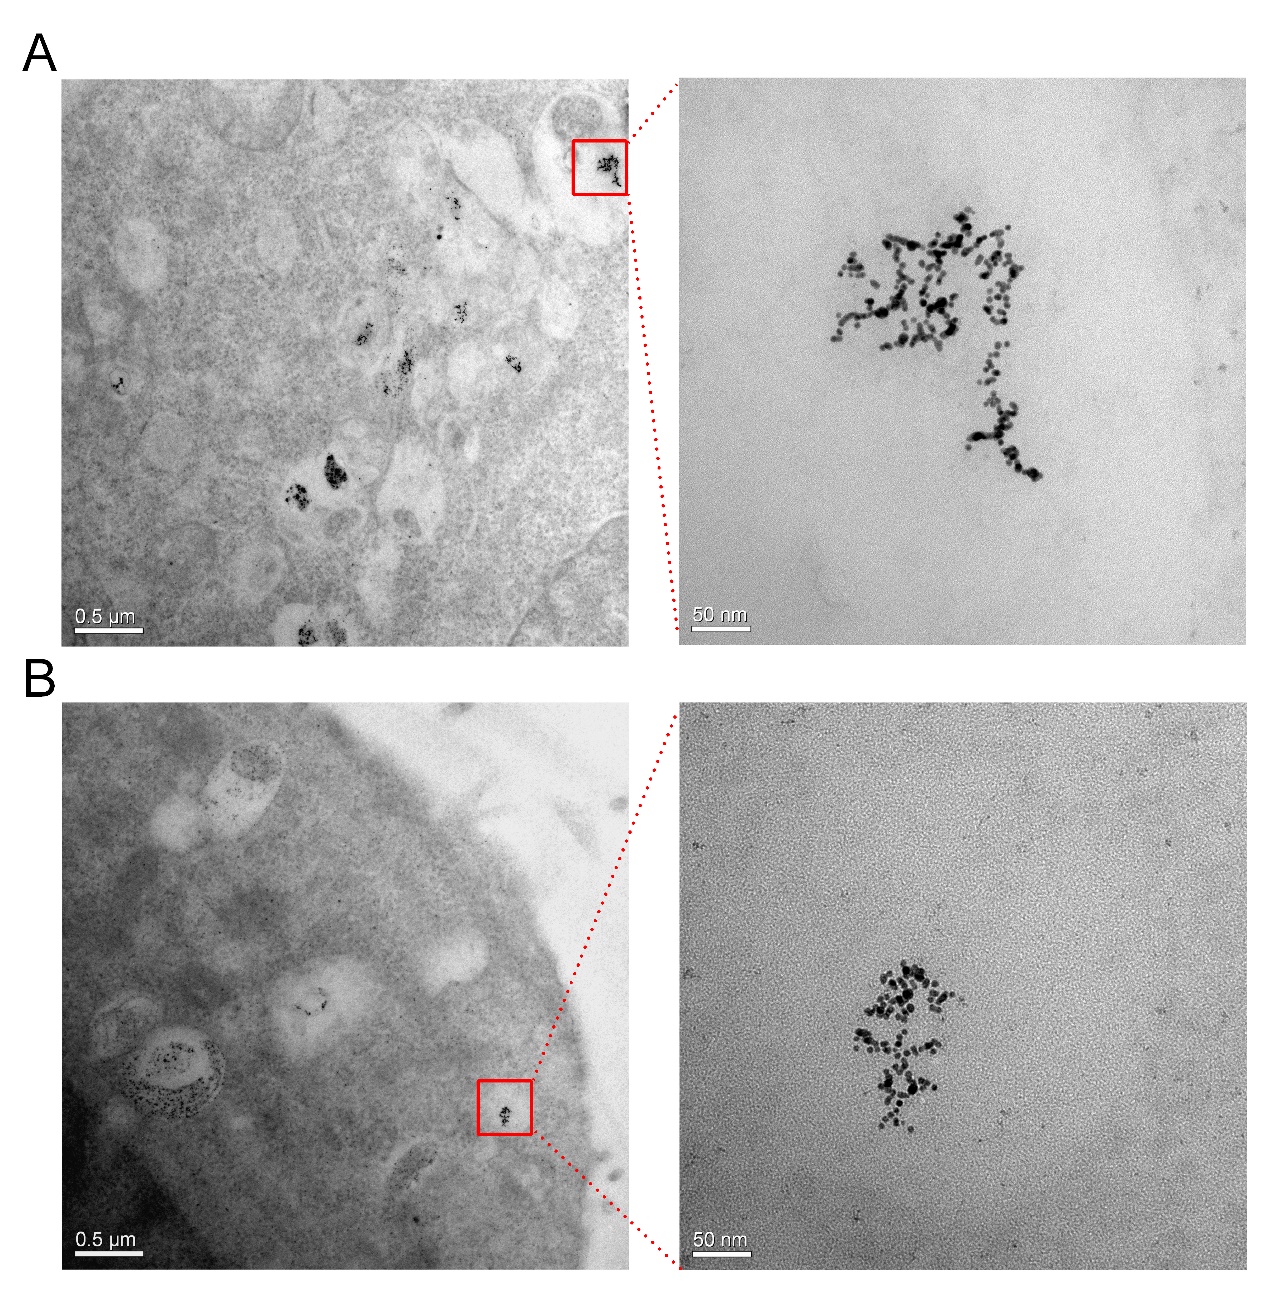


Figure S-2. Representative TEM images of TM3 cells after 48-h (A) or 72-h (B) exposure of AuNPs (5 μg/mL). AuNPs were mainly entrapped in the endosome/lysosome.


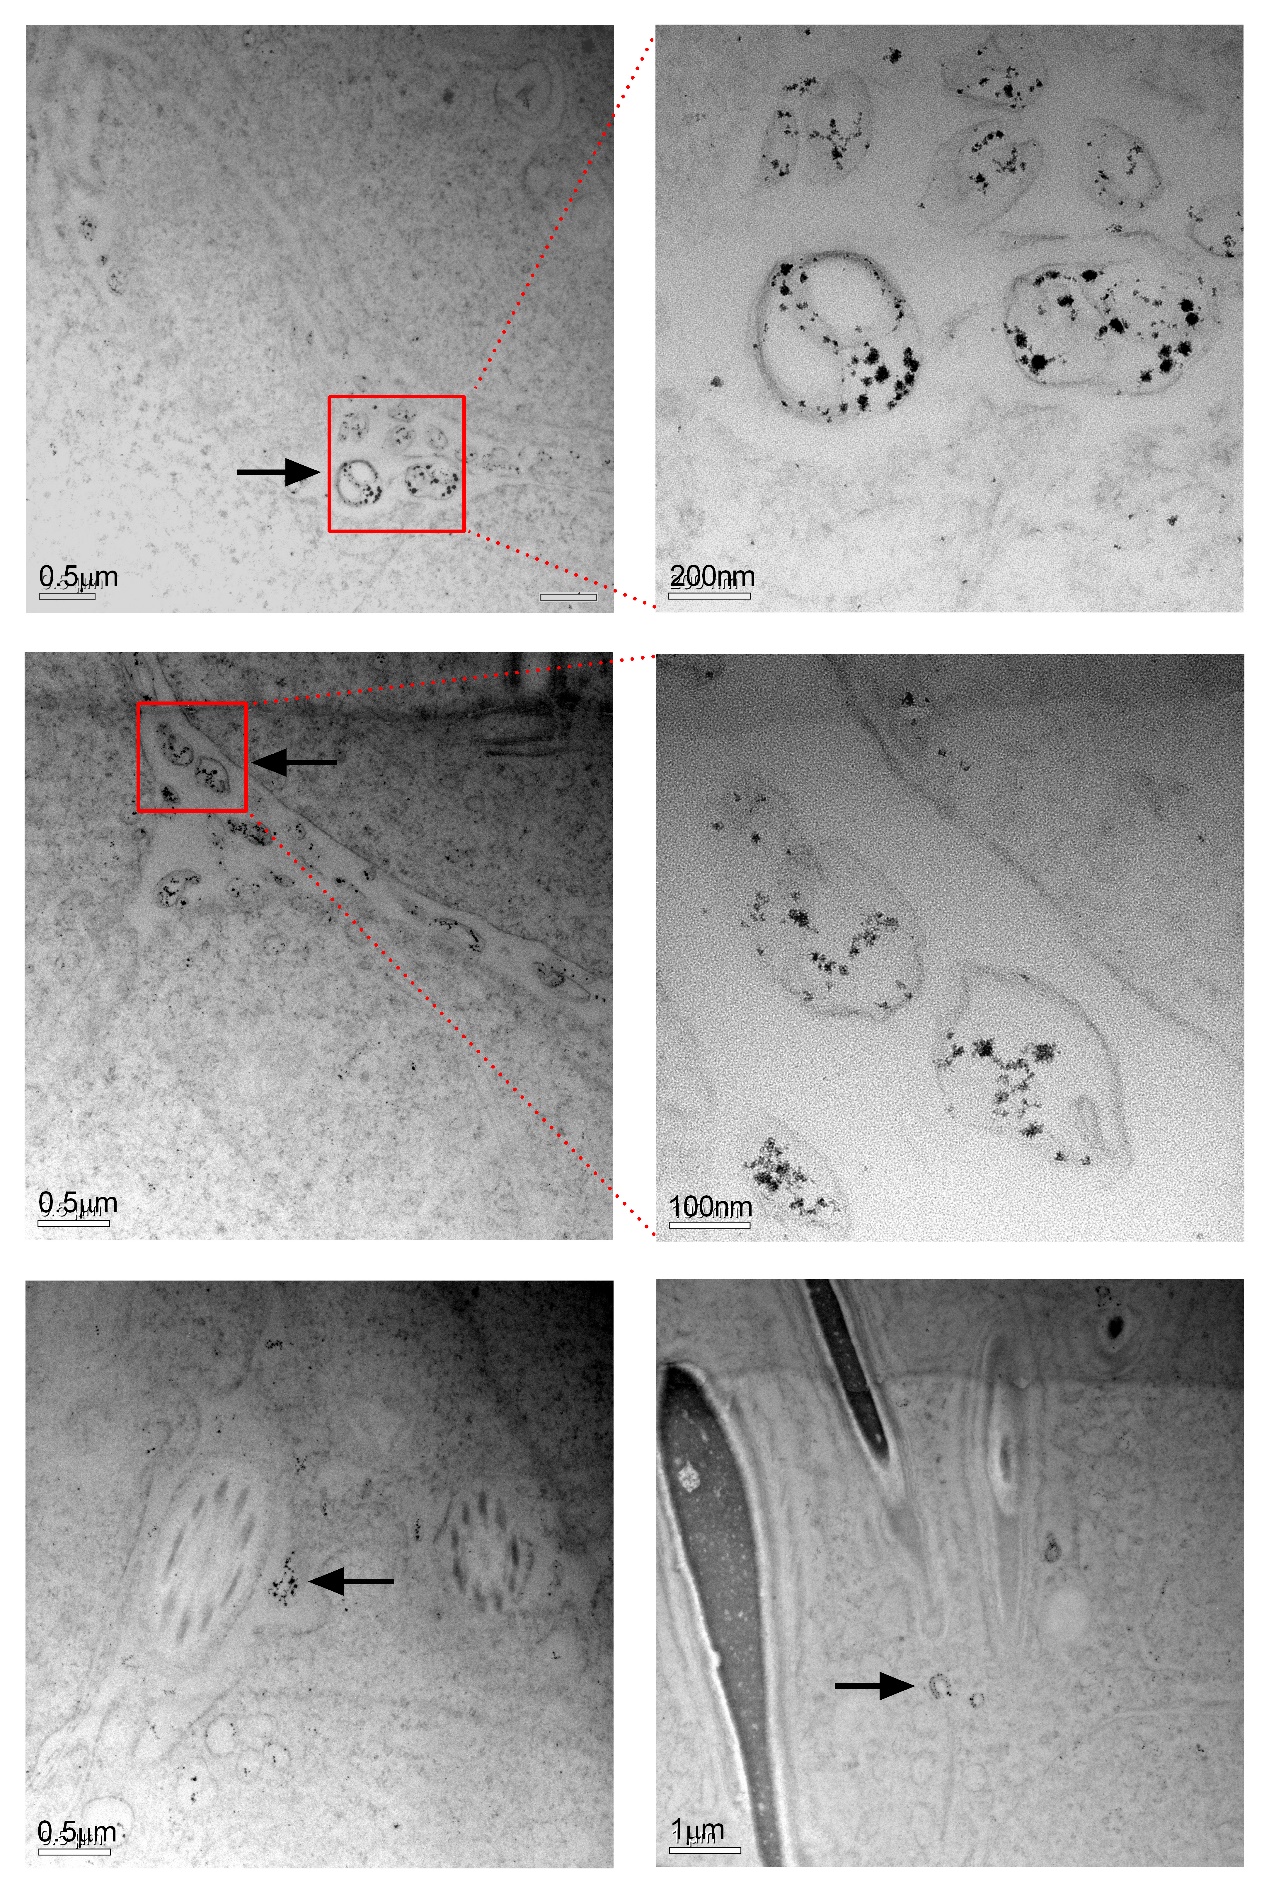


Figure S-3. TEM images of testicular sections in mice treated with 0.5 mg/kg AuNPs on day 14. Black dots (black arrow) in the section were AuNPs, which were obviously present in the testicular section and mainly packed in the vesicles.
